# Supplementary material for: Cyclodextrin induced controlled delivery of a biological photosensitizer from a nanocarrier to DNA
Source: Royal Society of Chemistry journal article supplement (doi:10.1039/c5cp06174a), 2015-12-24
Supplement: c5cp06174a1.pdf [file c5cp06174a1.pdf]

## Cyclodextrin induced controlled delivery of a biological photosensitizer from a nanocarrier to DNA

Pronab Kundu, Saptarshi Ghosh\*, Sinjan Das, and Nitin Chattopadhyay\*

Department of Chemistry, Jadavpur University, Kolkata - 700 032, India

\*Corresponding authors: Fax: 91-33-2414-6584

E-mail: [ghosh.saptarshi89@gmail.com](mailto:ghosh.saptarshi89@gmail.com) (S.G.)

[nitin.chattopadhyay@yahoo.com](mailto:nitin.chattopadhyay@yahoo.com) (N.C.)

### Supporting Information

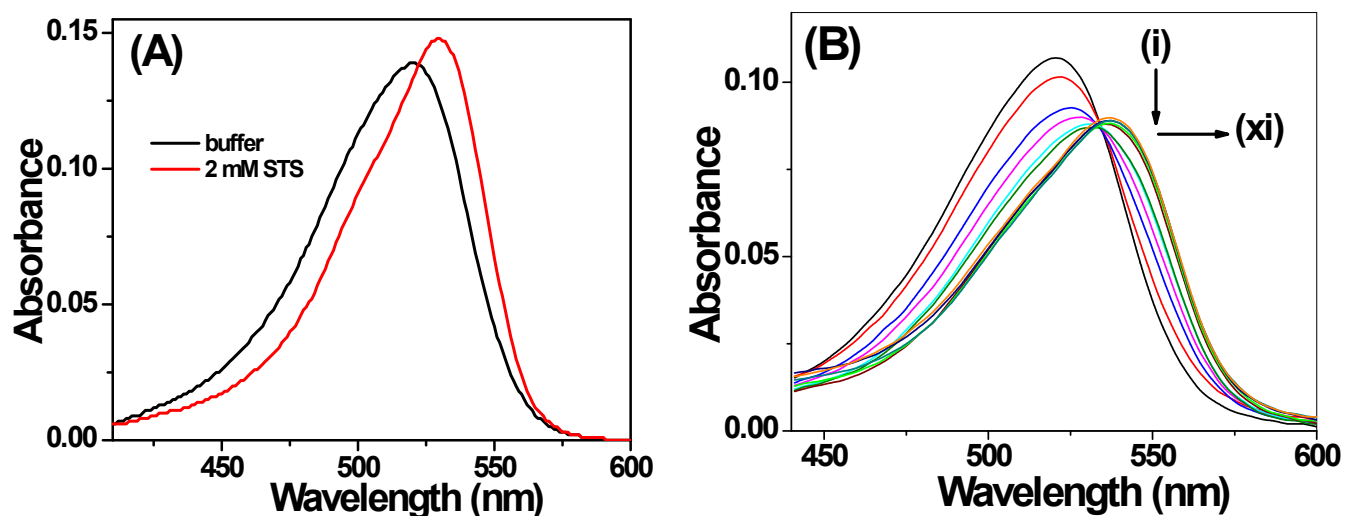

**Fig. S1.** (A) Absorption spectra of PSF in aqueous buffer and 2 mM STS medium. (B) Absorption spectra of PSF in the presence of different ctDNA concentrations. Curves (i) → (xi) correspond to 0, 5, 15, 20, 40, 50, 80, 100, 120, 130, 150  $\mu\text{M}$  of ctDNA. [PSF] = 5  $\mu\text{M}$ .

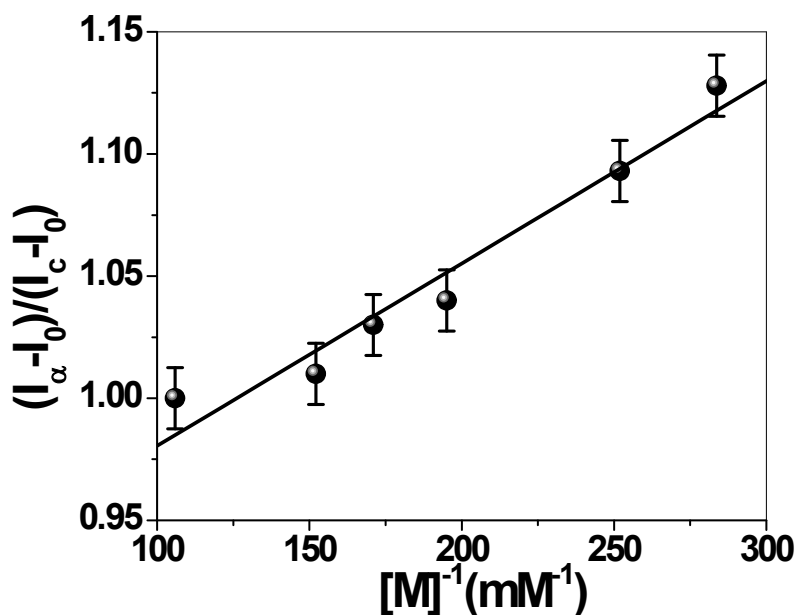

**Fig. S2.** Almgren plot for the determination of the binding constant of PSF with STS.  $I_0$ ,  $I_c$  and  $I_\alpha$  are the fluorescence intensities of PSF in the absence of STS, at an intermediate STS concentration and at a condition of complete interaction respectively.  $[M]$  is the micellar concentration.

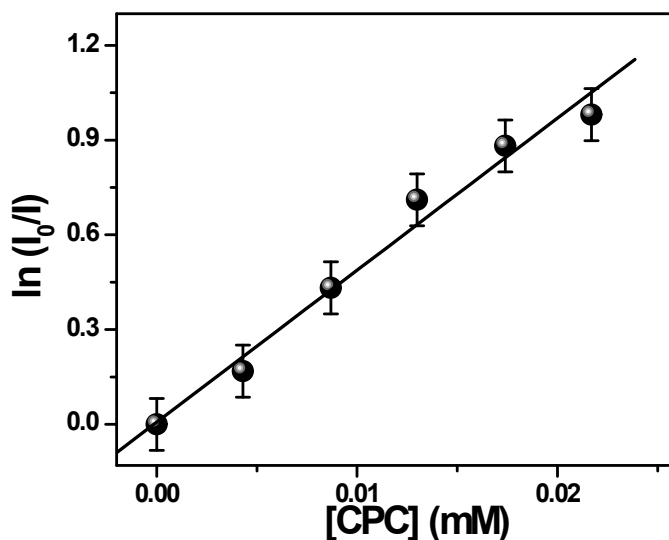

**Fig. S3.** Plot of  $\ln(I_0/I)$  against  $[CPC]$  for the determination of the aggregation number of STS.  $I_0$  and  $I$  are the fluorescence intensities of pyrene in the absence and presence of the quencher CPC respectively.  $[CPC]$  is the quencher concentration.

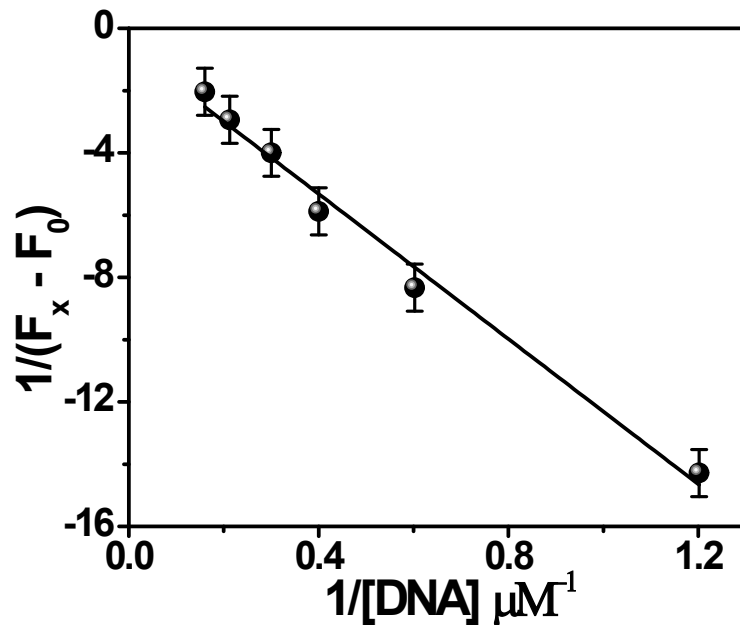

**Fig. S4.** Benesi-Hildebrand plot for the determination of the binding constant of PSF with ctDNA.  $F_0$  and  $F_x$  are the fluorescence intensities of PSF in the absence and at an intermediate ctDNA concentration respectively.  $[DNA]$  is the ctDNA concentration.

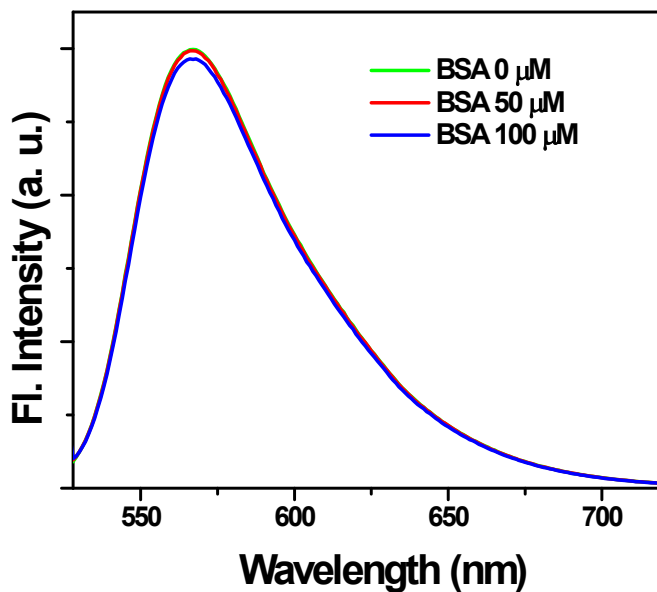

**Fig. S5.** Fluorescence spectra of STS micelle bound PSF in different BSA concentrations as mentioned in the legends.  $\lambda_{\text{ex}} = 520 \text{ nm}$ .  $[STS] = 2 \text{ mM}$ .

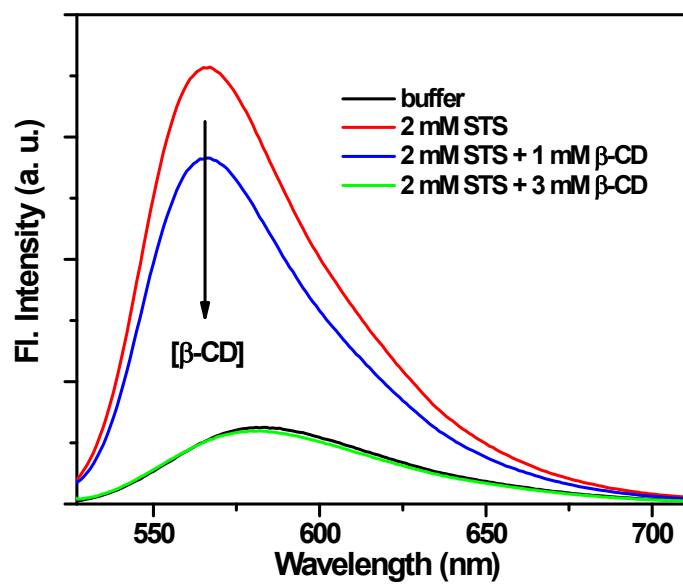

Fig. S6. Fluorescence spectra of PSF in different environments as mentioned in the legends.  $\lambda_{\text{ex}} = 520$  nm.

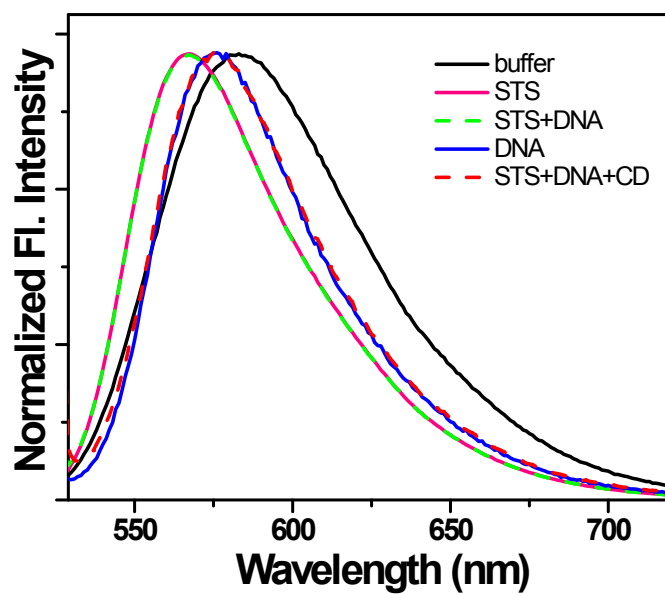

Fig. S7. Normalized fluorescence spectra of PSF in different environments as mentioned in the legends.

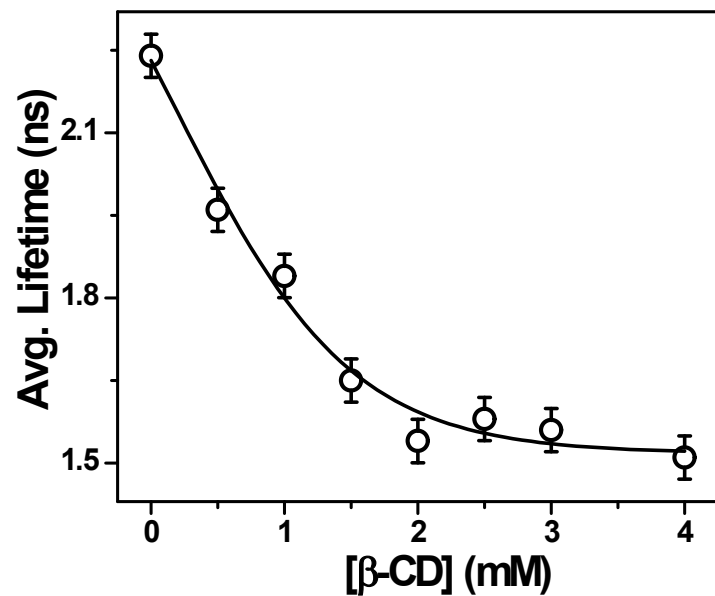

**Fig. S8.** Variation in the average fluorescence lifetime of PSF in STS-DNA mixture as a function of  $\beta$ -CD concentration.
